# Supplementary material for: Characterization of the Wheat-Psathyrostachys huashania Keng 2Ns/2D Substitution Line H139: A Novel Germplasm With Enhanced Resistance to Wheat Take-All
Source: Front Plant Sci. 2020 Mar 10;11:233. doi: 10.3389/fpls.2020.00233 (PMC7077511; doi:10.3389/fpls.2020.00233)
Supplement: TABLE S2 — The distribution proportion of differential SNP on chromosomes between H139 and 16-6. [file Table_2.xlsx]

## Sheet: Table S2
Table S2 The distribution proportion of differential SNP on chromosomes between H139 and 16-6
Chromosome	Differential SNP NO.	Total SNP NO.	The proportion (Differential SNP NO. /Total SNP NO.)
1A	2528	38870	0.0650373
1B	2122	30530	0.0695054
1D	1827	19349	0.0944235
2A	2923	43254	0.0675776
2B	2844	45881	0.0619864
2Ns(2D)	2785	22728	0.122536
3A	2022	29019	0.0696785
3B	3467	56851	0.060984
3D	1990	17418	0.11425
4A	2591	35998	0.0719762
4B	1610	19634	0.0820006
4D	1708	16119	0.105962
5A	2062	32286	0.0638667
5B	2727	43277	0.0630127
5D	2281	22739	0.100312
6A	1923	24489	0.0785251
6B	2458	36326	0.067665
6D	2149	18867	0.113903
7A	3065	38822	0.0789501
7B	2089	26426	0.0790509
7D	2738	26512	0.103274
